# Supplementary material for: Mineralogical and Chemical Tracing of Dust Variation in an Underground Historic Salt Mine
Source: MDPI journal article supplement (doi:10.3390/min11070686), 2021-06-26
Supplement: s1 [file s1]

Archive with 1 entries (1 files):
- minerals-1238651-supplementary.pdf
