# Supplementary material for: Mineralogical and Chemical Tracing of Dust Variation in an Underground Historic Salt Mine
Source: MDPI journal article supplement (doi:10.3390/min11070686), 2021-06-26
Supplement: s1 [file s1 › minerals-1238651-supplementary.pdf]

# Supplementary Materials: Mineralogical and Chemical Tracing of Dust Variation in an Underground Historic Salt Mine

Aleksandra Puławska \*, Maciej Manecki and Michał Flaszka

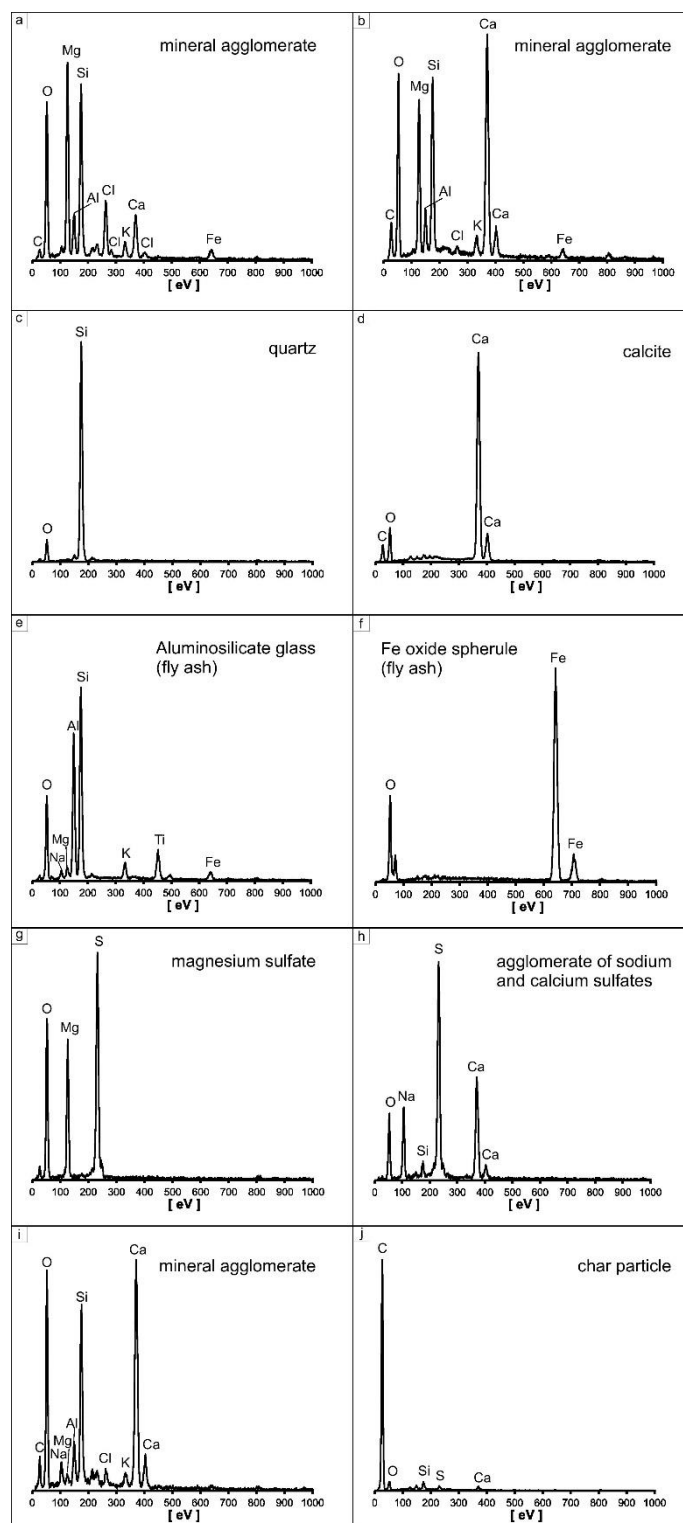

**Figure S1.** Representative EDS spectra of individual airborne particles settled in the entrance zone. The unlabeled peak at low eV on the EDS spectrum is a carbon tape artifact and this about 200 eV is due to the gold coating; (a) mineral agglomerate, (b) mineral agglomerate, (c) quartz, (d) calcite,

(e) aluminosilicate glass (fly ash), (f) Fe-oxide spherule, (g) magnesium-sulfate, (h) agglomerate of sodium- and calcium-sulfates, (i) mineral agglomerate, (j) char particle.

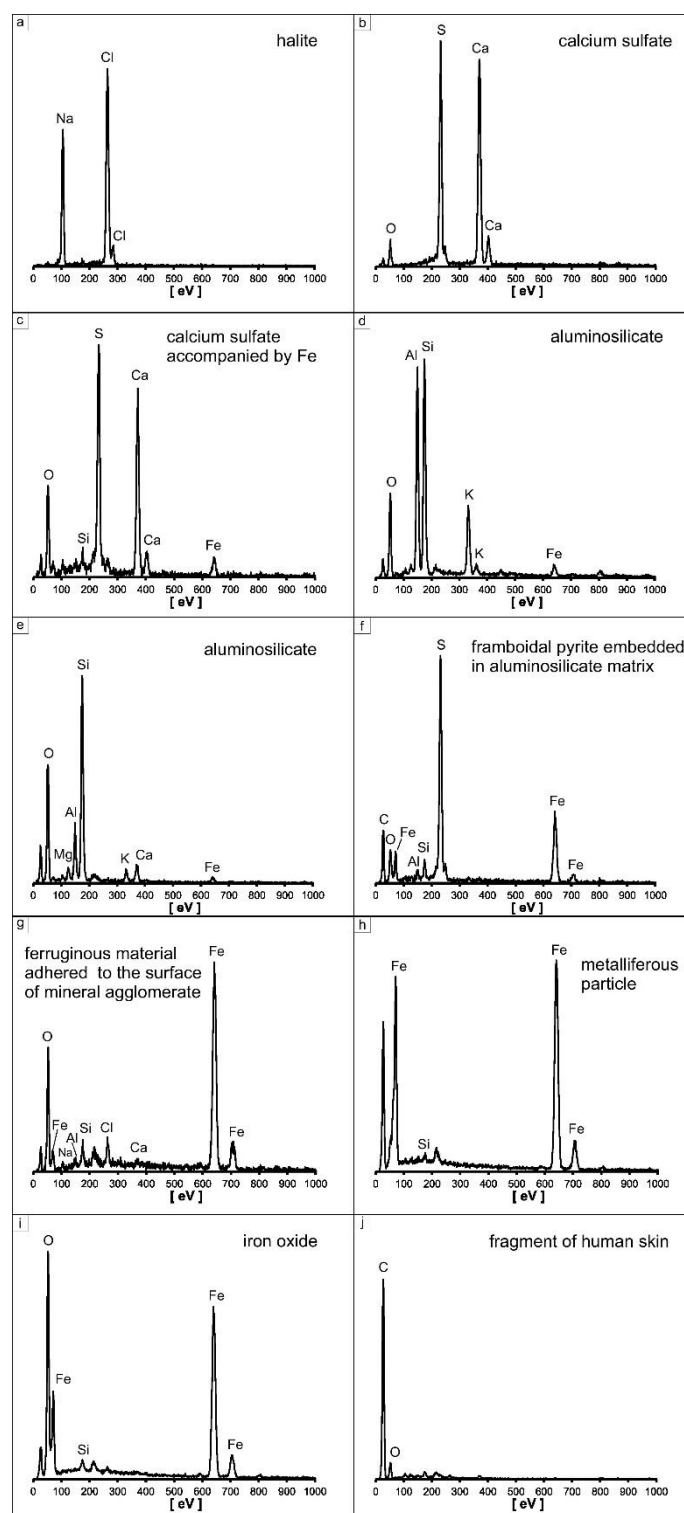

**Figure S2.** Representative EDS spectra of individual airborne particles settled in the mine interior. The unlabeled peak at low eV on the EDS spectrum is a carbon tape artifact and this about 200 eV is due to the gold coating; (a) halite, (b) calcium-sulfate, (c) calcium-sulfate accompanied by Fe, (d) aluminosilicate, (e) aluminosilicate, (f) framboidal pyrite embedded in aluminosilicate matrix, (g) ferruginous material adhered to the surface of mineral agglomerate, (h) metalliferous particle, (i) iron oxide, (j) fragment of human skin.

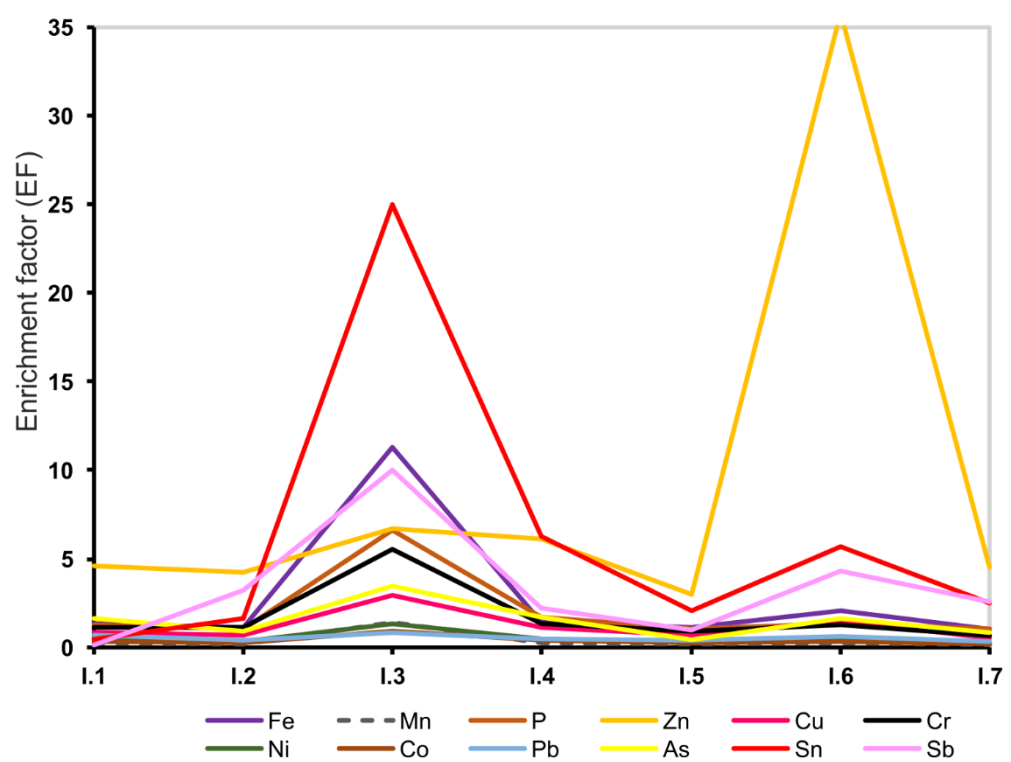

**Figure S3.** Enrichments factors (EFs) for metals in dusts collected in the mine interior with respect to the marine sediments concentrations.
